# Supplementary material for: Trends in atmospheric ammonia at urban, rural, and remote sites across NorthAmerica
Source: Copernicus journal article supplement (doi:10.5194/acp-16-11465-2016), 2016-09-14

Supplement of Atmos. Chem. Phys., 16, 11465–11475, 2016  
<http://www.atmos-chem-phys.net/16/11465/2016/>  
doi:10.5194/acp-16-11465-2016-supplement  
© Author(s) 2016. CC Attribution 3.0 License.

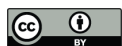

Atmospheric  
Chemistry  
and Physics  
Open Access  
EGU

*Supplement of*

## **Trends in atmospheric ammonia at urban, rural, and remote sites across North America**

**Xiaohong Yao and Leiming Zhang**

*Correspondence to:* Xiaohong Yao (xhyao@ouc.edu.cn) and Leiming Zhang (leiming.zhang@canada.ca)

The copyright of individual parts of the supplement might differ from the CC-BY 3.0 licence.

Fig. S1 The capture rate of the data in each month at six Canadian sites.

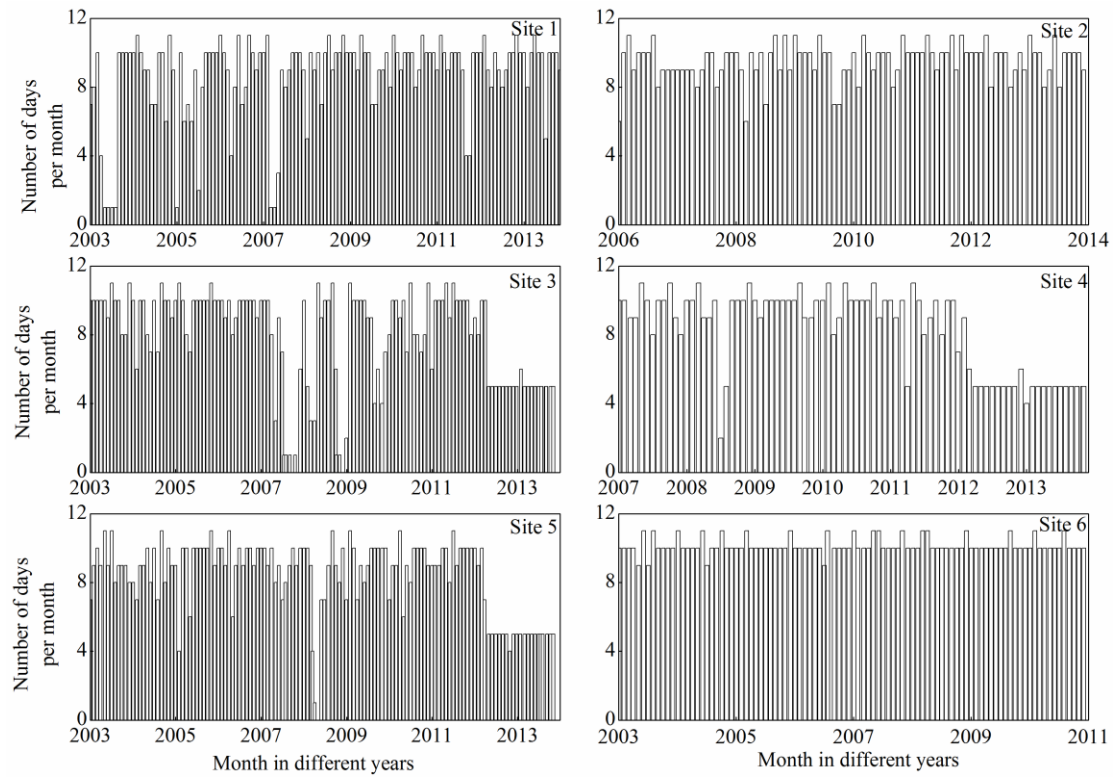

Fig. S2 Exponential correlations between atmospheric NH<sub>3</sub> and ambient T at six Canadian sites.

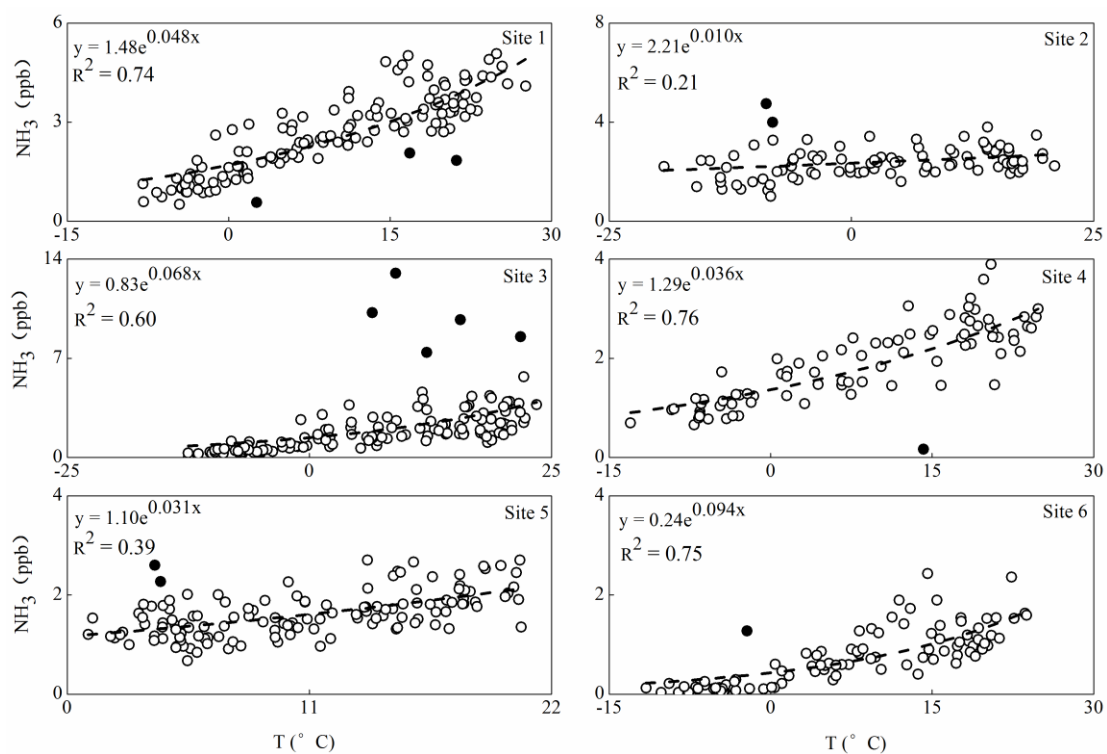

Fig. S3 Exponential correlations between atmospheric NH<sub>3</sub> and ambient T at eight U.S. sites

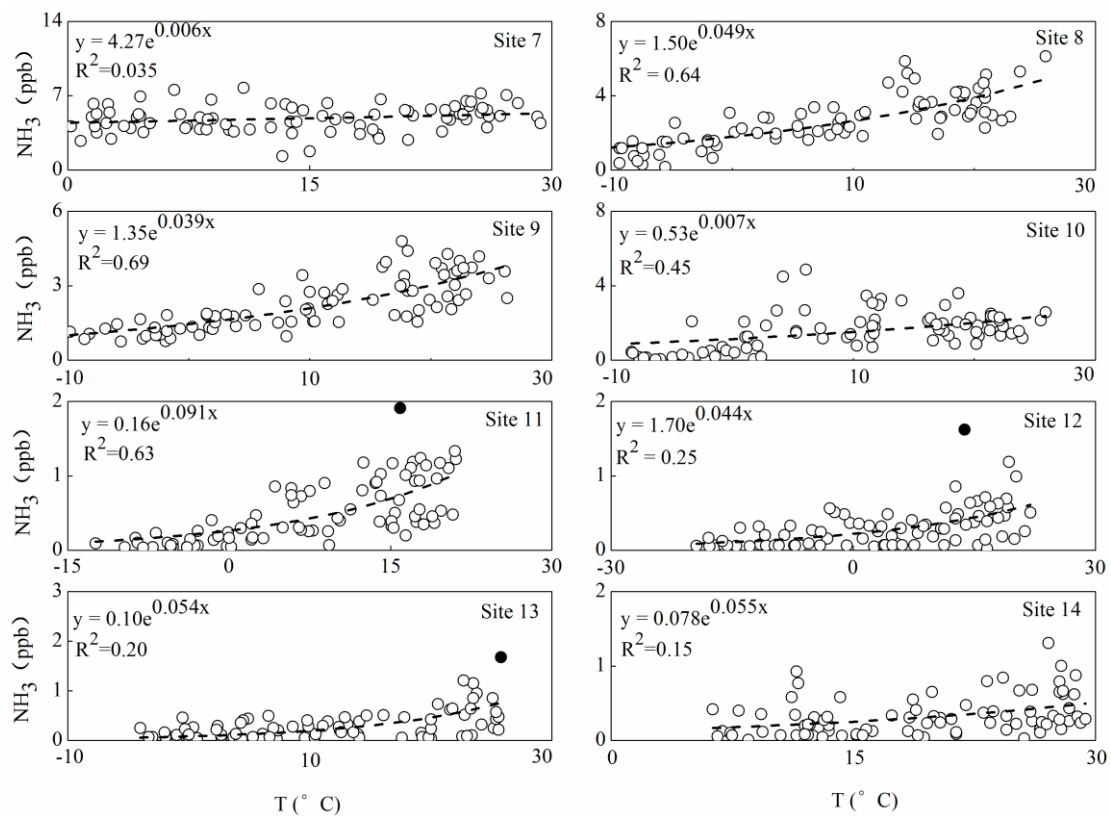

Fig. S4 Annual emissions of atmospheric NH<sub>3</sub> in three provinces of Canada (a: Ontario; B: Quebec; c: British Columba).

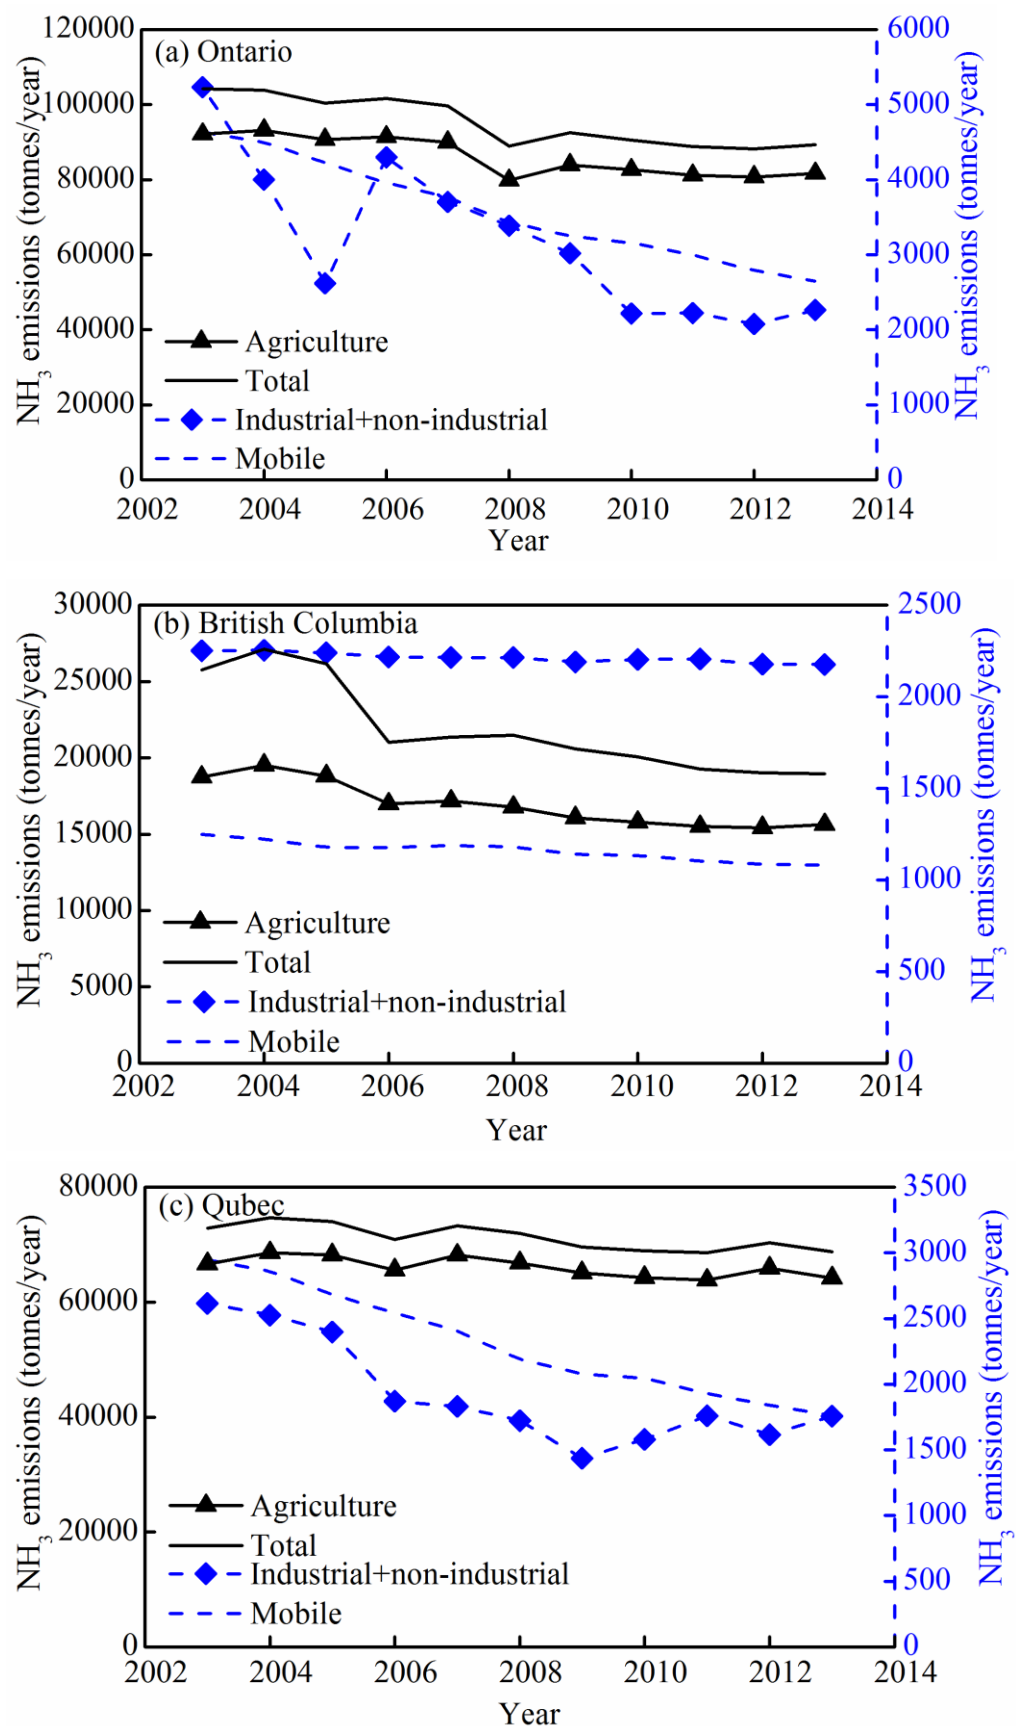

Fig. S5 The spectra of input data, IMFs and residual calculated by EEMD for atmospheric NH<sub>3</sub> at Site 1 from July 2003 to June 2014.

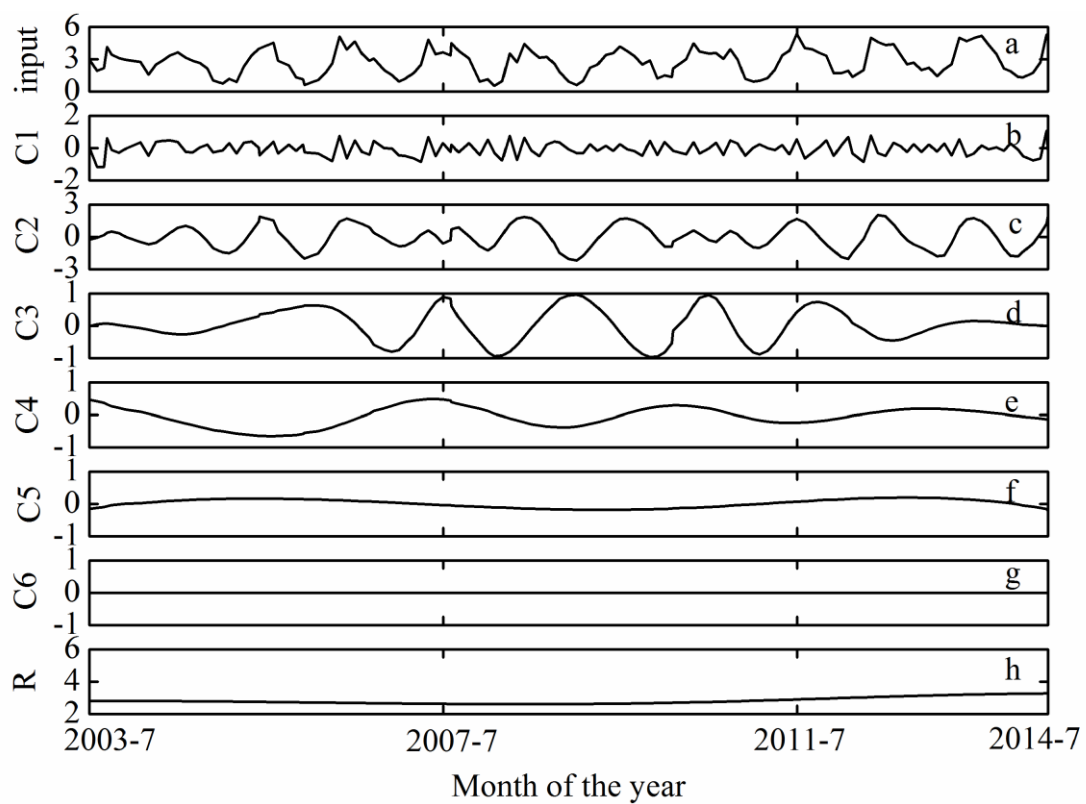

Fig. S6 The spectra of input data, IMFs and residual calculated by EEMD for  $\text{pNH}_4^+$  in  $\text{PM}_{2.5}$  at Site 1 from July 2003 to June 2014.

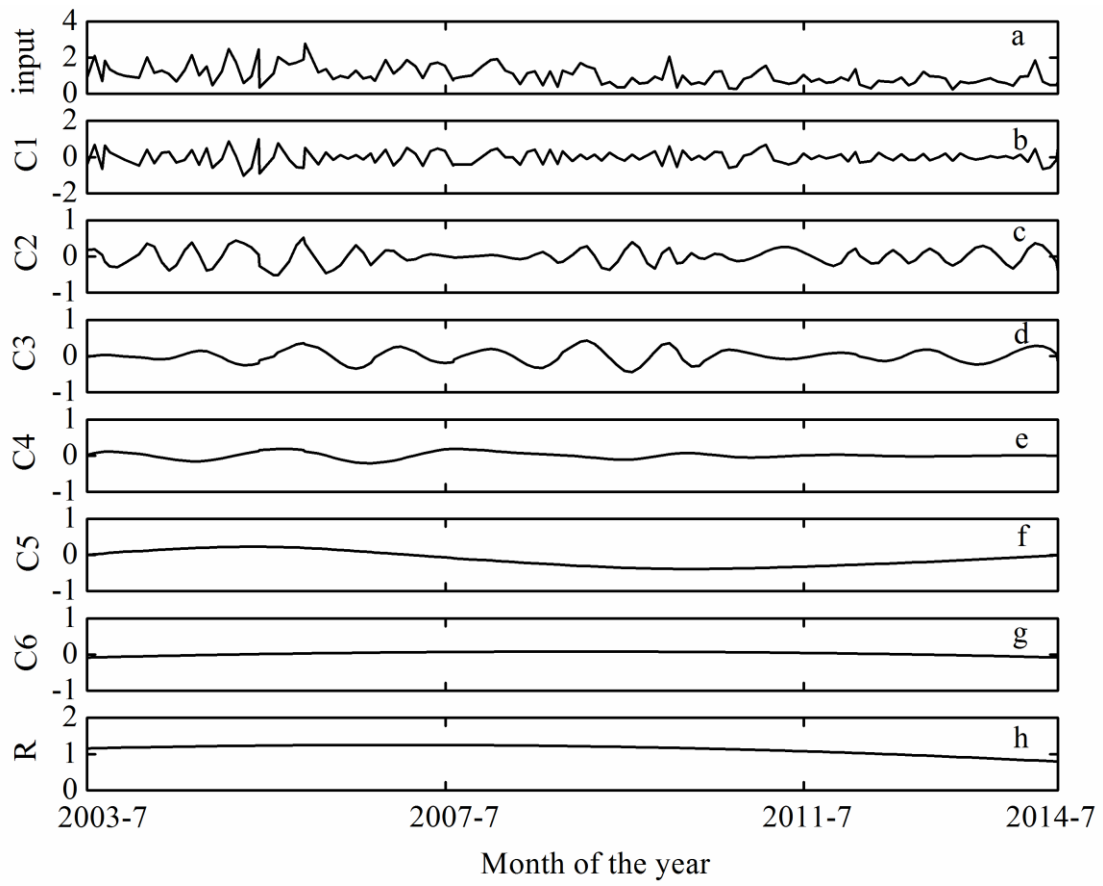

Supplement: Supplementary file 1 [file acp-16-11465-2016-supplement.pdf]
